# Supplementary material for: Controllable assembly of four new POM-based supramolecular compounds by altering the POM secondary building units from pseudo-Keggin to classical Keggin
Source: Royal Society of Chemistry journal article supplement (doi:10.1039/c0ce00967a), 2011-01-01
Supplement: c0ce00967a.pdf [file c0ce00967a.pdf]

## Supporting Information

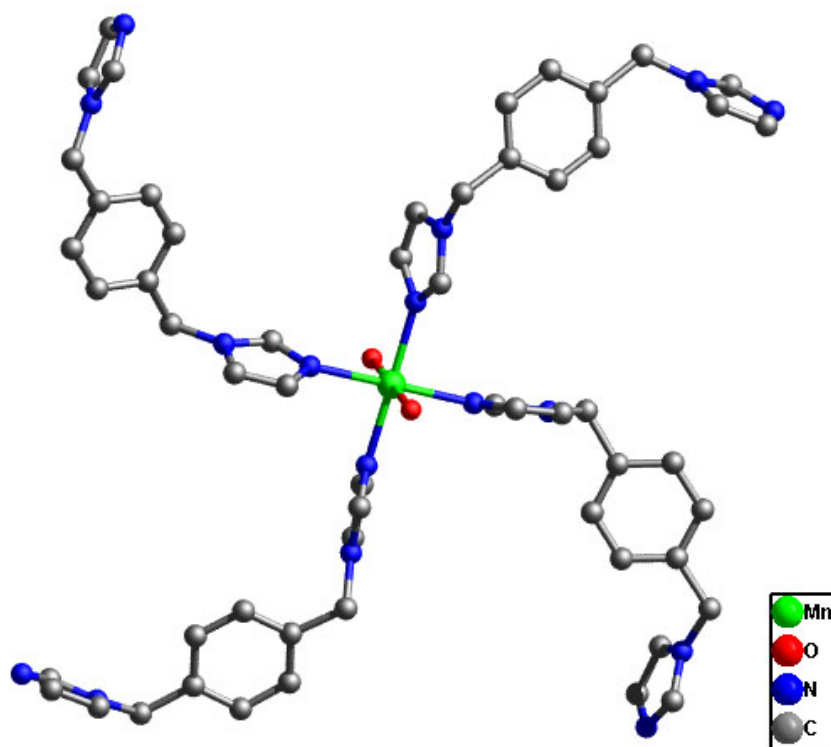

**Fig. S1.** Ball-and-stick representation of the propeller-shaped structures of the  $[\text{MnH}(\text{bix})_4]^{3+}$  complex fragments in compound **1**. (all of the hydrogen atoms are omitted for clarity).

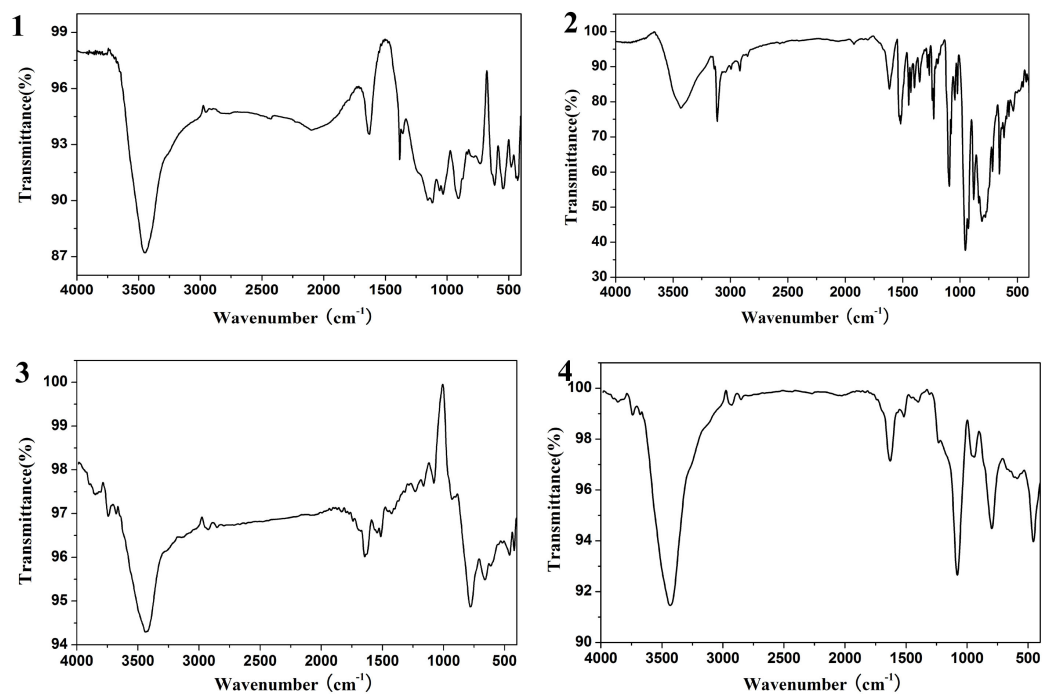

**Fig. S2.** The IR spectra of compounds **1-4**.

### The TG analysis

|            | Temperature    | first weight loss      | Temperature    | second weight loss       |
|------------|----------------|------------------------|----------------|--------------------------|
| Compound 1 | 45°C to 125°C  | 1.20%<br>(calcd 1.28%) | 150 to 358 °C  | 33.65%<br>(calcd 33.78%) |
| Compound 2 | 180°C to 240°C | 1.19%<br>(calcd 1.25%) | 260 to 580 °C  | 33.26%<br>(calcd 33.15%) |
| Compound 3 | 160°C to 200°C | 2.35%<br>(calcd 2.48%) | 210°C to 480°C | 32.87%<br>(calcd 32.76%) |
| Compound 4 | 100°C to 150°C | 2.28%<br>(calcd 2.37%) | 200°C to 350°C | 31.25%<br>(calcd 31.37%) |

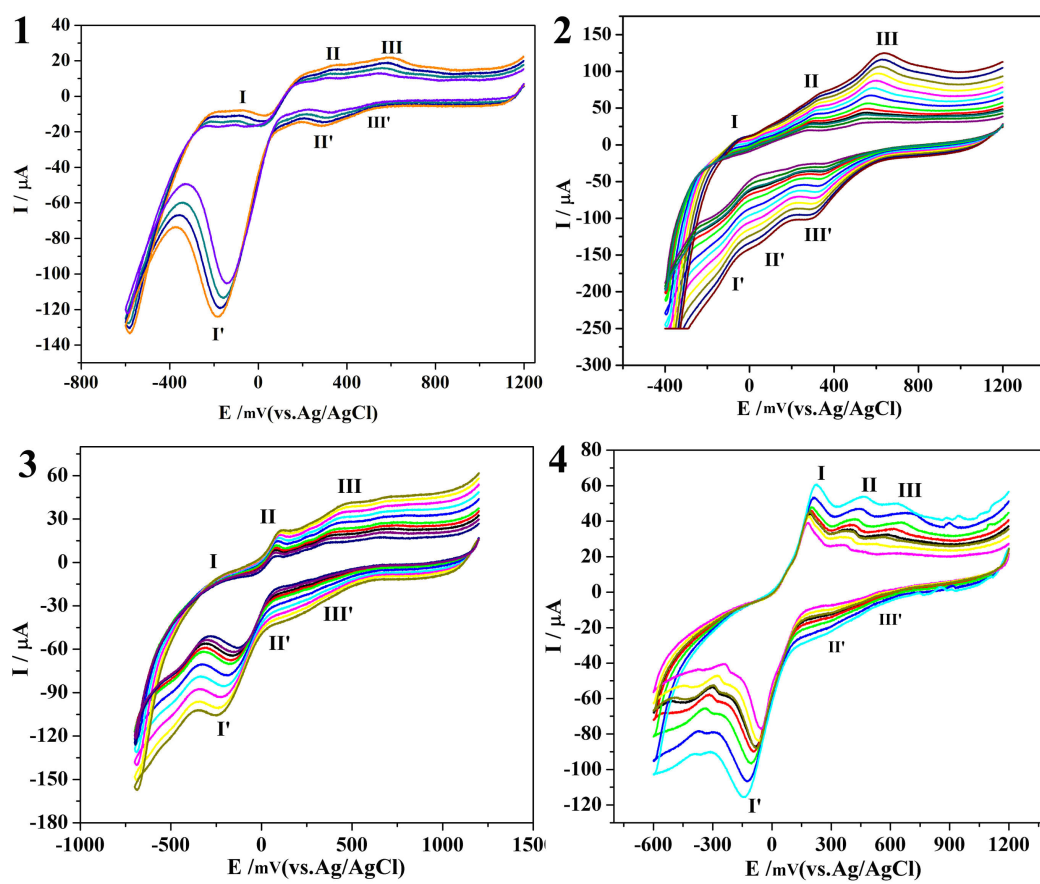

**Fig. S3.** The cyclic voltammograms of compounds 1-4 in 1M  $\text{H}_2\text{SO}_4$  at different scan rates.

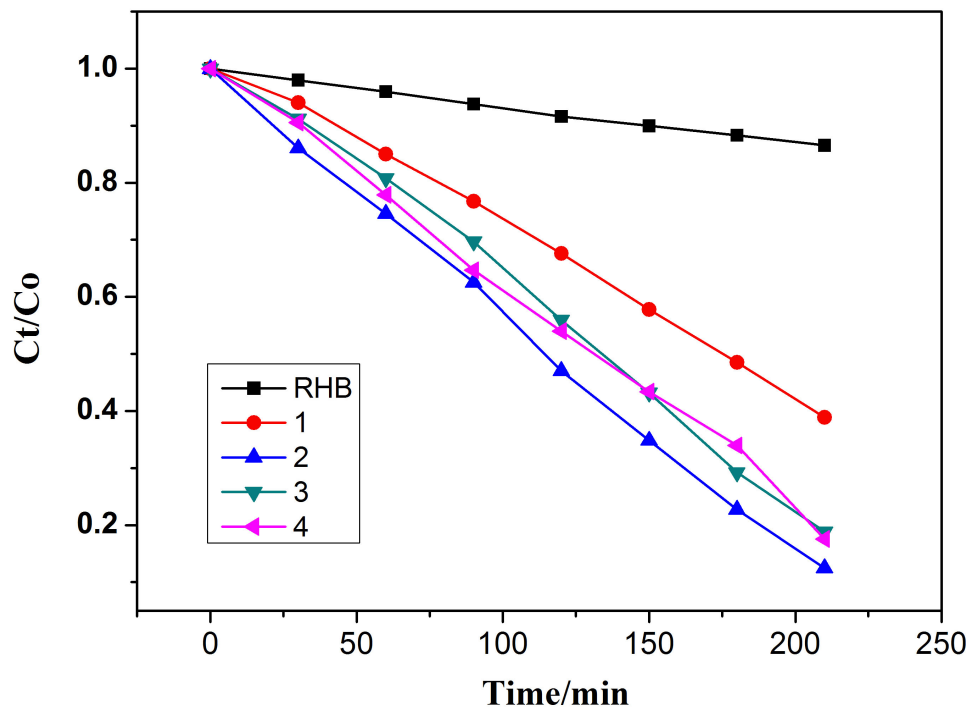

**Fig. S4.** Changes in  $C_t/C_0$  plot of RhB solutions ( $2 \times 10^{-5}$  mol L<sup>-1</sup>) versus reaction time in the presence of 5 mg compounds **1-4**.

**Table S1.** Selected bond lengths (Å) for compound **1**.

|              |          |               |          |
|--------------|----------|---------------|----------|
| Mo(1)-O(1)   | 1.686(6) | Mo(2)-O(3)    | 1.679(7) |
| Mo(1)-O(9)   | 1.806(6) | Mo(2)-O(6)    | 1.802(6) |
| Mo(1)-O(5)   | 1.817(6) | Mo(2)-O(7)    | 1.811(6) |
| Mo(1)-O(8)   | 2.057(6) | Mo(2)-O(8)    | 2.053(6) |
| Mo(1)-O(11)  | 2.065(6) | Mo(2)-O(11)#1 | 2.072(6) |
| Mo(1)-O(4)   | 2.395(6) | Mo(2)-O(4)    | 2.457(6) |
| V(2)-O(2)    | 1.616(6) | Mn(1)-N(1)    | 2.167(9) |
| V(2)-O(7)#2  | 1.902(6) | Mn(1)-N(1)#1  | 2.167(9) |
| V(2)-O(9)#3  | 1.902(6) | Mn(1)-N(1)#4  | 2.167(9) |
| V(2)-O(6)    | 1.939(6) | Mn(1)-N(1)#5  | 2.167(9) |
| V(2)-O(5)    | 1.940(6) | Mn(1)-O(10)#5 | 2.193(9) |
| V(1)-O(10)   | 1.634(9) | Mn(1)-O(10)   | 2.193(9) |
| V(1)-O(11)   | 1.896(6) | P(1)-O(4)#1   | 1.533(6) |
| V(1)-O(11)#1 | 1.896(6) | P(1)-O(4)#3   | 1.533(6) |
| V(1)-O(8)    | 1.970(6) | P(1)-O(4)     | 1.533(6) |
| V(1)-O(8)#1  | 1.970(6) | P(1)-O(4)#2   | 1.533(6) |

Symmetry transformations used to generate equivalent atoms:

#1 -x+0,-y-1/2,z+0      #2 -y-1/4,x-1/4,-z+3/4      #3 y+1/4,-x-1/4,-z+3/4

#4 -y-1/4,x-1/4,-z+7/4      #5 y+1/4,-x-1/4,-z+7/4

**Table S2.** Selected bond lengths (Å) for compound **2**.

|               |          |              |          |
|---------------|----------|--------------|----------|
| P(1)-O(9)#1   | 1.532(3) | P(1)-O(9)#2  | 1.532(3) |
| P(1)-O(9)     | 1.532(3) | P(1)-O(9)#3  | 1.532(3) |
| Zn(1)-N(1)    | 2.124(4) | Zn(1)-N(1)#5 | 2.124(4) |
| Zn(1)-O(1)    | 2.209(4) | Zn(1)-N(1)#4 | 2.124(4) |
| Zn(1)-O(1)#5  | 2.209(4) | Zn(1)-N(1)#2 | 2.124(4) |
| V(1)-O(1)     | 1.624(4) | V(1)-O(3)    | 1.981(3) |
| V(1)-O(10)#2  | 1.897(3) | V(1)-O(3)#2  | 1.981(3) |
| V(1)-O(10)    | 1.897(3) | Mo(1)-O(8)   | 1.678(3) |
| Mo(3)-O(2)    | 1.619(3) | Mo(1)-O(7)   | 1.813(3) |
| Mo(3)-O(7)#3  | 1.907(3) | Mo(1)-O(6)   | 1.816(3) |
| Mo(3)-O(4)#3  | 1.913(3) | Mo(1)-O(3)   | 2.043(3) |
| Mo(3)-O(6)    | 1.937(3) | Mo(1)-O(10)  | 2.054(3) |
| Mo(3)-O(11)#2 | 1.950(3) | Mo(1)-O(9)#2 | 2.457(3) |
| Mo(3)-O(9)#2  | 2.477(3) | Mo(2)-O(10)  | 2.048(3) |
| Mo(2)-O(5)    | 1.686(3) | Mo(2)-O(3)#2 | 2.056(3) |
| Mo(2)-O(4)    | 1.802(3) | Mo(2)-O(9)   | 2.394(3) |
| Mo(2)-O(11)   | 1.812(3) |              |          |

Symmetry transformations used to generate equivalent atoms:

#1  $y+1/4, -x+3/4, -z-1/4$     #2  $-x+1, -y+1/2, z+0$     #3  $-y+3/4, x-1/4, -z-1/4$

#4  $-y+3/4, x-1/4, -z+3/4$     #5  $y+1/4, -x+3/4, -z+3/4$

**Table S3.** Selected bond lengths (Å) for compound **3**.

|               |          |               |          |
|---------------|----------|---------------|----------|
| Cu(1)-N(1)#1  | 2.038(7) | Cu(1)-N(1)#3  | 2.038(7) |
| Cu(1)-N(1)#2  | 2.038(7) | Cu(1)-O(1)#3  | 2.353(8) |
| Cu(1)-N(1)    | 2.038(7) | Cu(1)-O(1)    | 2.353(8) |
| Mo(1)-O(8)    | 1.695(6) | Mo(2)-O(7)    | 1.680(6) |
| Mo(1)-O(4)    | 1.793(6) | Mo(2)-O(2)    | 1.803(6) |
| Mo(1)-O(6)    | 1.813(6) | Mo(2)-O(5)    | 1.805(6) |
| Mo(1)-O(10)   | 2.042(5) | Mo(2)-O(9)    | 2.051(6) |
| Mo(1)-O(9)    | 2.057(6) | Mo(2)-O(10)#1 | 2.051(5) |
| Mo(1)-O(3)    | 2.398(6) | Mo(2)-O(3)    | 2.454(6) |
| Mo(3)-O(11)   | 1.607(6) | Mo(3)-O(5)    | 1.943(6) |
| Mo(3)-O(2)#4  | 1.909(6) | Mo(3)-O(6)    | 1.957(6) |
| Mo(3)-O(4)#5  | 1.915(6) | Mo(3)-O(3)    | 2.475(5) |
| V(1)-O(1)     | 1.599(8) | P(1)-O(3)#4   | 1.539(6) |
| V(1)-O(10)    | 1.902(5) | P(1)-O(3)#1   | 1.539(6) |
| V(1)-O(10)#1  | 1.902(5) | P(1)-O(3)     | 1.539(6) |
| V(1)-O(9)     | 1.979(5) | P(1)-O(3)#5   | 1.539(6) |
| V(1)-O(9)#1   | 1.979(5) | O(2)-V(2)#5   | 1.909(6) |
| O(4)-Mo(3)#4  | 1.915(6) | O(2)-Mo(3)#5  | 1.909(6) |
| O(10)-Mo(2)#1 | 2.051(5) | O(4)-V(2)#4   | 1.915(6) |

Symmetry transformations used to generate equivalent atoms:

#1 -x+0,-y+1/2,z+0      #2 -y+1/4,x+1/4,-z+1/4      #3 y-1/4,-x+1/4,-z+1/4  
 #4 -y+1/4,x+1/4,-z+5/4      #5 y-1/4,-x+1/4,-z+5/4



**Table S4.** Selected bond lengths (Å) for compound **4**.

|               |           |               |           |
|---------------|-----------|---------------|-----------|
| Mo(1)-O(10)   | 1.643(8)  | Mo(2)-O(12)   | 1.654(8)  |
| Mo(1)-O(9)    | 1.847(9)  | Mo(2)-O(6)    | 1.845(8)  |
| Mo(1)-O(15)   | 1.858(8)  | Mo(2)-O(11)   | 1.846(9)  |
| Mo(1)-O(13)   | 1.926(8)  | Mo(2)-O(17)   | 1.925(8)  |
| Mo(1)-O(6)    | 1.931(8)  | Mo(2)-O(16)   | 1.951(9)  |
| Mo(1)-O(21)   | 2.435(13) | Mo(2)-O(2)    | 2.403(13) |
| Mo(1)-O(2)    | 2.454(13) | Mo(2)-O(1)    | 2.407(14) |
| Mo(3)-O(5)    | 1.650(8)  | Mo(4)-O(4)    | 1.649(8)  |
| Mo(3)-O(19)   | 1.837(9)  | Mo(4)-O(14)   | 1.791(8)  |
| Mo(3)-O(17)#1 | 1.847(9)  | Mo(4)-O(16)#1 | 1.862(9)  |
| Mo(3)-O(18)   | 1.951(10) | Mo(4)-O(9)    | 1.928(9)  |
| Mo(3)-O(15)#1 | 1.957(9)  | Mo(4)-O(8)    | 1.990(9)  |
| Mo(3)-O(20)   | 2.417(12) | Mo(4)-O(21)   | 2.424(12) |
| Mo(3)-O(2)#1  | 2.495(13) | Mo(4)-O(1)#1  | 2.464(14) |
| Mo(5)-O(3)    | 1.651(8)  | Mo(6)-O(7)    | 1.659(7)  |
| Mo(5)-O(22)   | 1.811(10) | Mo(6)-O(8)#1  | 1.825(9)  |
| Mo(5)-O(13)   | 1.863(9)  | Mo(6)-O(18)   | 1.843(11) |
| Mo(5)-O(19)   | 1.935(9)  | Mo(6)-O(11)   | 1.962(10) |
| Mo(5)-O(14)   | 1.997(9)  | Mo(6)-O(22)   | 1.980(10) |
| Mo(5)-O(20)   | 2.431(13) | Mo(6)-O(20)   | 2.433(12) |
| Mo(5)-O(21)   | 2.496(13) | Mo(6)-O(1)    | 2.500(13) |
| Cu(1)-N(1)#2  | 1.873(9)  | Cu(2)-N(4)    | 1.876(10) |
| Cu(1)-N(1)    | 1.873(9)  | Cu(2)-N(5)    | 1.879(10) |
| P(1)-O(1)     | 1.529(13) | P(1)-O(21)#1  | 1.538(13) |
| P(1)-O(1)#1   | 1.529(13) | P(1)-O(21)    | 1.538(13) |
| P(1)-O(2)     | 1.535(13) | P(1)-O(20)    | 1.581(12) |
| P(1)-O(2)#1   | 1.535(13) | P(1)-O(20)#1  | 1.581(12) |

Symmetry transformations used to generate equivalent atoms:

#1  $-x+1,-y,-z$     #2  $-x+1,-y+1,-z$

**Table S5.** The bond valence sum calculations for V and Mo atoms in compounds **1-4**.

---

|                   |       |     |       |
|-------------------|-------|-----|-------|
| <b>Compound 1</b> |       |     |       |
| Mo1               | 6.006 | V1  | 4.199 |
| Mo2               | 6.031 | V2  | 4.565 |
| <b>Compound 2</b> |       |     |       |
| Mo1               | 6.016 | V1  | 4.189 |
| Mo2               | 6.058 | V2  | 4.510 |
| Mo3               | 6.189 |     |       |
| <b>Compound 3</b> |       |     |       |
| Mo1               | 6.059 | Mo3 | 6.103 |
| Mo2               | 6.146 | V1  | 4.246 |
| <b>Compound 4</b> |       |     |       |
| Mo1               | 6.466 | Mo4 | 6.470 |
| Mo2               | 6.430 | Mo5 | 6.343 |
| Mo3               | 6.364 | Mo6 | 6.288 |

---

**Table S6.** Hydrogen bonds for compounds **1-4**.

| <b>Compound 1</b>     |       |       |           |
|-----------------------|-------|-------|-----------|
| Donor---H....Acceptor | D - H | H...A | D...A     |
| N(9)--H(9A)..O(3)     | 0.86  | 2.10  | 2.915(14) |
| N(9)--H(9A)..O(40)    | 0.86  | 2.59  | 3.120(15) |
| C(3)--H(3B)..O(3)     | 0.97  | 2.39  | 3.278(16) |
| C(4)--H(4A)..O(8)     | 0.93  | 2.60  | 3.524(18) |
| C(11)--H(11A)..O(8)   | 0.93  | 2.59  | 3.504(15) |
| C(17)--H(17A)..N(8)   | 0.93  | 2.59  | 2.895(15) |
| C(17)--H(17A)..O(10)  | 0.93  | 2.50  | 3.380(15) |
| C(34)--H(34A)..O(3)   | 0.93  | 2.60  | 3.316(15) |
| C(74)--H(74A)..O(21)  | 0.97  | 2.48  | 3.438(17) |
| <b>Compound 2</b>     |       |       |           |
| Donor---H....Acceptor | D - H | H...A | D...A     |
| N(5)--H(5A)..O(5)     | 0.86  | 2.05  | 2.870(12) |
| C(2)--H(2B)..O(7)     | 0.97  | 2.46  | 3.425(13) |
| C(3)--H(3A)..O(5)     | 0.93  | 2.56  | 3.293(11) |
| C(18)--H(18A)..N(4)   | 0.93  | 2.59  | 2.901(11) |
| C(18)--H(18A)..O(8)   | 0.93  | 2.47  | 3.348(11) |
| C(21)--H(21A)..O(2)   | 0.93  | 2.57  | 3.487(11) |
| C(23)--H(23A)..O(5)   | 0.97  | 2.38  | 3.273(10) |
| <b>Compound 3</b>     |       |       |           |
| Donor---H....Acceptor | D - H | H...A | D...A     |
| C(2)--H(2A)..O(2)     | 0.97  | 2.49  | 3.444(11) |
| C(6)--H(6A)..O(1)     | 0.93  | 2.58  | 3.089(10) |
| C(12)--H(12A)..O(7)   | 0.93  | 2.45  | 3.342(12) |
| C(14)--H(14A)..O(11)  | 0.93  | 2.57  | 3.488(10) |
| C(26)--H(26B)..O(8)   | 0.97  | 2.36  | 3.270(11) |
| <b>Compound 4</b>     |       |       |           |
| Donor---H....Acceptor | D - H | H...A | D...A     |
| C(3)--H(3B)..O(6)     | 0.97  | 2.56  | 3.39(2)   |
| C(3)--H(3B)..O(12)    | 0.97  | 2.51  | 3.39(2)   |
| C(4)--H(4A)..N(2)     | 0.93  | 2.55  | 2.86(2)   |
| C(6)--H(6A)..O(11)    | 0.93  | 2.56  | 3.38(2)   |
| C(6)--H(6A)..O(22)    | 0.93  | 2.53  | 3.258(18) |
| C(10)--H(10A)..O(5)   | 0.93  | 2.39  | 3.174(17) |
| C(11)--H(11A)..O(3)   | 0.93  | 2.50  | 3.289(19) |
| C(11)--H(11A)..O(13)  | 0.93  | 2.53  | 3.37(2)   |
| C(13)--H(13A)..O(6)   | 0.93  | 2.57  | 3.496(19) |
| C(14)--H(14A)..O(9)   | 0.93  | 2.37  | 3.239(18) |
| C(23)--H(23A)..O(17)  | 0.93  | 2.47  | 3.34(2)   |

|                      |      |      |           |
|----------------------|------|------|-----------|
| C(25)--H(25B)..O(16) | 0.97 | 2.58 | 3.510(18) |
| C(26)--H(26A)..O(3)  | 0.93 | 2.25 | 3.017(16) |
| C(27)--H(27A)..Ow(1) | 0.93 | 2.54 | 3.345(18) |
| C(27)--H(27A)..O(12) | 0.93 | 2.36 | 2.939(19) |
| C(28)--H(28A)..Ow(1) | 0.93 | 1.87 | 2.783(19) |
